# Supplementary material for: A metagenomic insight into freshwater methane-utilizing communities and evidence for cooperation between the Methylococcaceae and the Methylophilaceae
Source: PubMed Central journal article supplement (PMC3628875; doi:10.7717/peerj.23), 2013-02-19
Supplement: peerj-01-23-s004.pdf [file peerj-01-23-s004.pdf]

Supplemental Table 1. Distribution of 16S rRNA genes among major phyla, classified to the family level

| Phylum                  | Class                         | Order                   | Family                              | Un-<br>amen-<br>ded | +O <sub>2</sub> -<br>NO <sub>3</sub> <sup>-</sup> | +O <sub>2</sub> +N<br>O <sub>3</sub> <sup>-</sup> | -O <sub>2</sub> -<br>NO <sub>3</sub> <sup>-</sup> | -O <sub>2</sub><br>+NO <sub>3</sub> <sup>-</sup> |
|-------------------------|-------------------------------|-------------------------|-------------------------------------|---------------------|---------------------------------------------------|---------------------------------------------------|---------------------------------------------------|--------------------------------------------------|
| Proteobacteria          | Gammaproteobacteria           | Methylococcales         | Methylococcaceae                    | 15                  | 26                                                | 4                                                 | 2                                                 | 6                                                |
| Bacteroidetes           | unclassified<br>Bacteroidetes |                         |                                     | 23                  | 1                                                 | 2                                                 | 2                                                 | 14                                               |
| Proteobacteria          | Gammaproteobacteria           | Acidithiobacillales     | Acidithiobacillaceae                | 0                   | 1                                                 | 0                                                 | 0                                                 | 0                                                |
| Proteobacteria          | Gammaproteobacteria           | Thiotrichales           | Piscirickettsiaceae                 | 0                   | 1                                                 | 0                                                 | 0                                                 | 0                                                |
| Actinobacteria          | Actinobacteria                | Actinobacteridae        | unclassified<br>Actinobacteridae    | 0                   | 0                                                 | 0                                                 | 1                                                 | 0                                                |
| Cyanobacteria           | Cyanobacteria                 | Family II               | GpIIa                               | 0                   | 0                                                 | 0                                                 | 2                                                 | 1                                                |
| Acidobacteria           | Acidobacteria Gp10            | Gp10                    |                                     | 0                   | 0                                                 | 0                                                 | 0                                                 | 1                                                |
| Actinobacteria          | Actinobacteria                | Acidimicrobidae         | Acidimicrobiales                    | 0                   | 0                                                 | 0                                                 | 0                                                 | 1                                                |
| Bacteroidetes           | Flavobacteria                 | Flavobacteriales        | Cryomorphaceae                      | 0                   | 0                                                 | 0                                                 | 0                                                 | 2                                                |
| Chloroflexi             | Caldilineae                   | Caldilineales           | Caldilineaceae                      | 0                   | 0                                                 | 0                                                 | 0                                                 | 2                                                |
| Firmicutes              | Clostridia                    | unclassified Clostridia |                                     | 0                   | 0                                                 | 0                                                 | 0                                                 | 1                                                |
| Proteobacteria          | Deltaproteobacteria           | Bdellovibrionales       | Bacteriovoracaceae                  | 0                   | 0                                                 | 0                                                 | 0                                                 | 1                                                |
| Proteobacteria          | Gammaproteobacteria           | Pseudomonadales         | Pseudomonadaceae                    | 0                   | 0                                                 | 0                                                 | 0                                                 | 2                                                |
| TM7                     | TM7 genera incertae<br>sedis  |                         |                                     | 0                   | 0                                                 | 0                                                 | 0                                                 | 2                                                |
| Euryarchaeota           | Methanomicrobia               | Methanomicrobiales      | Methanomicrobiaceae                 | 1                   | 0                                                 | 0                                                 | 0                                                 | 0                                                |
| Euryarchaeota           | Thermoplasmata                | Thermoplasmatales       | Thermoplasmatales<br>incertae sedis | 2                   | 0                                                 | 0                                                 | 0                                                 | 0                                                |
| unclassified<br>Archaea |                               |                         |                                     | 8                   | 0                                                 | 0                                                 | 1                                                 | 4                                                |
| Acidobacteria           | Acidobacteria Gp17            | Gp17                    |                                     | 3                   | 2                                                 | 0                                                 | 1                                                 | 0                                                |
| Acidobacteria           | Acidobacteria Gp3             | Gp3                     |                                     | 5                   | 0                                                 | 0                                                 | 0                                                 | 0                                                |

|                |                              |                                  |                                |    |    |   |   |   |
|----------------|------------------------------|----------------------------------|--------------------------------|----|----|---|---|---|
| Acidobacteria  | Acidobacteria Gp6            | Gp6                              |                                | 8  | 0  | 0 | 3 | 4 |
| Acidobacteria  | Holophagae                   | Holophagales                     | Holophagaceae                  | 4  | 0  | 0 | 1 | 4 |
| Actinobacteria | Actinobacteria               | Actinobacteridae                 | Actinomycetales                | 9  | 2  | 0 | 0 | 3 |
| Actinobacteria | Actinobacteria               | Rubrobacteridae                  | Solirubrobacterales            | 1  | 1  | 0 | 1 | 1 |
| Bacteroidetes  | Bacteroidetes incertae sedis | Prolixibacter                    |                                | 2  | 1  | 0 | 0 | 2 |
| Bacteroidetes  | Flavobacteria                | Flavobacteriales                 | unclassified Flavobacteriales  | 1  | 0  | 0 | 0 | 0 |
| Bacteroidetes  | Sphingobacteria              | Sphingobacteriales               | Sphingobacteriaceae            | 1  | 0  | 0 | 0 | 0 |
| Chlamydiae     | Chlamydiae                   | Chlamydiales                     | unclassified Chlamydiales      | 1  | 0  | 0 | 0 | 0 |
| Chloroflexi    | Dehalococcoidetes            | Dehalogenimonas                  |                                | 3  | 0  | 0 | 1 | 0 |
| Cyanobacteria  | Cyanobacteria                | Chloroplast                      | Bacillariophyta                | 5  | 2  | 0 | 3 | 1 |
| Cyanobacteria  | Cyanobacteria                | Chloroplast                      | unclassified Chloroplast       | 1  | 0  | 0 | 0 | 0 |
| Firmicutes     | Clostridia                   | Clostridiales                    | Incertae Sedis XI              | 1  | 0  | 0 | 0 | 0 |
| Lentisphaerae  | Lentisphaeria                | unclassified Lentisphaeria       |                                | 1  | 0  | 0 | 0 | 0 |
| OD1            | OD1 genera incertae sedis    |                                  |                                | 4  | 1  | 0 | 0 | 1 |
| Planctomycetes | Planctomycetacia             | Planctomycetales                 | Planctomycetaceae              | 11 | 7  | 0 | 1 | 7 |
| Proteobacteria | Alphaproteobacteria          | Rhizobiales                      | unclassified Rhizobiales       | 2  | 2  | 0 | 0 | 1 |
| Proteobacteria | Alphaproteobacteria          | Rhodospirillales                 | Rhodospirillaceae              | 2  | 0  | 0 | 0 | 0 |
| Proteobacteria | Betaproteobacteria           | Burkholderiales                  | Burkholderiales incertae sedis | 6  | 3  | 1 | 0 | 2 |
| Proteobacteria | Betaproteobacteria           | Burkholderiales                  | Oxalobacteraceae               | 5  | 0  | 1 | 0 | 8 |
| Proteobacteria | Betaproteobacteria           | Methylophilales                  | Methylophilaceae               | 5  | 21 | 1 | 0 | 5 |
| Proteobacteria | Betaproteobacteria           | Rhodocyclales                    | Rhodocyclaceae                 | 4  | 0  | 0 | 0 | 7 |
| Proteobacteria | Deltaproteobacteria          | Desulfobacteriales               | Desulfobacteraceae             | 1  | 1  | 0 | 1 | 3 |
| Proteobacteria | Deltaproteobacteria          | Desulfuromonadales               | Geobacteraceae                 | 2  | 1  | 0 | 0 | 0 |
| Proteobacteria | Deltaproteobacteria          | Myxococcales                     | Nannocystineae                 | 3  | 0  | 0 | 0 | 0 |
| Proteobacteria | Deltaproteobacteria          | Myxococcales                     | unclassified Myxococcales      | 2  | 3  | 0 | 2 | 0 |
| Proteobacteria | Deltaproteobacteria          | unclassified Deltaproteobacteria |                                | 9  | 4  | 0 | 0 | 7 |

|                 |                              |                                           |                                |    |   |   |   |   |
|-----------------|------------------------------|-------------------------------------------|--------------------------------|----|---|---|---|---|
| Proteobacteria  | Epsilonproteobacteria        | Campylobacterales                         | Helicobacteraceae              | 3  | 0 | 0 | 1 | 2 |
| Proteobacteria  | Gammaproteobacteria          | Xanthomonadales                           | Sinobacteraceae                | 4  | 2 | 0 | 1 | 2 |
| Proteobacteria  | unclassified Proteobacteria  |                                           |                                | 9  | 6 | 0 | 0 | 6 |
| Spirochaetes    | Spirochaetes                 | Spirochaetales                            | Spirochaetaceae                | 2  | 0 | 0 | 0 | 0 |
| Verrucomicrobia | Opitutae                     | Opitutaes                                 | Opitutaceae                    | 2  | 0 | 0 | 0 | 2 |
| Verrucomicrobia | Subdivision3                 | Subdivision3 genera incertae sedis        |                                | 13 | 3 | 0 | 0 | 3 |
| Verrucomicrobia | unclassified Verrucomicrobia |                                           |                                | 8  | 0 | 0 | 1 | 6 |
| WS3             | WS3 genera incertae sedis    |                                           |                                | 2  | 0 | 0 | 0 | 0 |
| Actinobacteria  | Actinobacteria               | Rubrobacteridae                           | unclassified Rubrobacteridae   | 0  | 1 | 0 | 0 | 0 |
| Firmicutes      | Clostridia                   | Clostridiales                             | Ruminococcaceae                | 0  | 1 | 0 | 1 | 0 |
| Proteobacteria  | Alphaproteobacteria          | Rhizobiales                               | Hyphomicrobiaceae              | 0  | 1 | 0 | 0 | 1 |
| Proteobacteria  | Alphaproteobacteria          | Rickettsiales                             | Anaplasmataceae                | 0  | 1 | 0 | 0 | 0 |
| Proteobacteria  | Gammaproteobacteria          | Pseudomonadales                           | Moraxellaceae                  | 0  | 2 | 0 | 0 | 0 |
| Euryarchaeota   | Thermoplasmata               | Thermoplasmatales                         | unclassified Thermoplasmatales | 0  | 0 | 0 | 1 | 0 |
| Chlamydiae      | Chlamydiae                   | Chlamydiales                              | Waddliaceae                    | 0  | 0 | 0 | 1 | 0 |
| OP11            | OP11 genera incertae sedis   |                                           |                                | 0  | 0 | 0 | 1 | 0 |
| Acidobacteria   | Acidobacteria Gp11           | Gp11                                      |                                | 0  | 0 | 0 | 0 | 1 |
| Bacteroidetes   | Bacteroidetes incertae sedis | unclassified Bacteroidetes incertae sedis |                                | 0  | 0 | 0 | 0 | 1 |
| Bacteroidetes   | Sphingobacteria              | Sphingobacteriales                        | Saprospiraceae                 | 0  | 0 | 0 | 0 | 2 |
| Cyanobacteria   | Cyanobacteria                | unclassified                              |                                | 0  | 0 | 0 | 0 | 1 |

|                  |                               |                                |                                    |    |   |   |   |   |
|------------------|-------------------------------|--------------------------------|------------------------------------|----|---|---|---|---|
|                  |                               | Cyanobacteria                  |                                    |    |   |   |   |   |
| Proteobacteria   | Alphaproteobacteria           | Sphingomonadales               | unclassified<br>Sphingomonadales   | 0  | 0 | 0 | 0 | 1 |
| Proteobacteria   | Gammaproteobacteria           | Legionellales                  | Legionellaceae                     | 0  | 0 | 0 | 0 | 1 |
| Proteobacteria   | Gammaproteobacteria           | Thiotrichales                  | Thiotrichaceae                     | 0  | 0 | 0 | 0 | 1 |
| Euryarchaeota    | Methanomicrobia               | Methanomicrobiales             | unclassified<br>Methanomicrobiales | 1  | 0 | 0 | 0 | 0 |
| Euryarchaeota    | unclassified<br>Euryarchaeota |                                |                                    | 13 | 3 | 0 | 1 | 2 |
| Acidobacteria    | Acidobacteria Gp16            | Gp16                           |                                    | 3  | 1 | 0 | 0 | 2 |
| Acidobacteria    | Acidobacteria Gp22            | Gp22                           |                                    | 3  | 0 | 0 | 0 | 0 |
| Acidobacteria    | Acidobacteria Gp4             | Gp4                            |                                    | 4  | 0 | 0 | 0 | 1 |
| Acidobacteria    | Acidobacteria Gp7             | Gp7                            |                                    | 1  | 0 | 0 | 0 | 4 |
| Actinobacteria   | Actinobacteria                | Acidimicrobidae                | unclassified<br>Acidimicrobidae    | 1  | 0 | 0 | 0 | 1 |
| Actinobacteria   | Actinobacteria                | Coriobacteridae                | Coriobacteriales                   | 3  | 1 | 0 | 0 | 1 |
| Actinobacteria   | Actinobacteria                | unclassified<br>Actinobacteria |                                    | 4  | 0 | 0 | 0 | 4 |
| Bacteroidetes    | Flavobacteria                 | Flavobacteriales               | Flavobacteriaceae                  | 1  | 2 | 0 | 0 | 2 |
| Bacteroidetes    | Sphingobacteria               | Sphingobacteriales             | Chitinophagaceae                   | 7  | 2 | 0 | 0 | 3 |
| Bacteroidetes    | Sphingobacteria               | Sphingobacteriales             | unclassified<br>Sphingobacteriales | 4  | 1 | 0 | 0 | 5 |
| Chlamydiae       | Chlamydiae                    | Chlamydiales                   | Parachlamydiaceae                  | 1  | 0 | 0 | 0 | 2 |
| Chloroflexi      | Anaerolineae                  | Anaerolineales                 | Anaerolineaceae                    | 17 | 1 | 0 | 2 | 5 |
| Chloroflexi      | unclassified<br>Chloroflexi   |                                |                                    | 2  | 2 | 0 | 0 | 3 |
| Cyanobacteria    | Cyanobacteria                 | Chloroplast                    | Chlorophyta                        | 1  | 0 | 0 | 0 | 0 |
| Firmicutes       | Bacilli                       | Bacillales                     | Bacillaceae                        | 1  | 0 | 0 | 0 | 0 |
| Gemmatimonadetes | Gemmatimonadetes              | Gemmatimonadales               | Gemmatimonadaceae                  | 8  | 2 | 0 | 1 | 1 |
| Nitrospira       | Nitrospira                    | Nitrospirales                  | Nitrospiraceae                     | 3  | 0 | 1 | 1 | 2 |

|                 |                            |                                      |                              |    |    |   |   |   |
|-----------------|----------------------------|--------------------------------------|------------------------------|----|----|---|---|---|
| OP10            | OP10 genera incertae sedis |                                      |                              | 1  | 0  | 0 | 0 | 0 |
| Proteobacteria  | Alphaproteobacteria        | Caulobacterales                      | Caulobacteraceae             | 1  | 1  | 0 | 0 | 0 |
| Proteobacteria  | Alphaproteobacteria        | Rhizobiales                          | Xanthobacteraceae            | 1  | 0  | 0 | 0 | 0 |
| Proteobacteria  | Alphaproteobacteria        | unclassified Alphaproteobacteria     |                              | 6  | 0  | 0 | 1 | 0 |
| Proteobacteria  | Betaproteobacteria         | Burkholderiales                      | Comamonadaceae               | 3  | 0  | 4 | 1 | 5 |
| Proteobacteria  | Betaproteobacteria         | Burkholderiales                      | unclassified Burkholderiales | 2  | 3  | 0 | 0 | 1 |
| Proteobacteria  | Betaproteobacteria         | Nitrosomonadales                     | Nitrosomonadaceae            | 4  | 0  | 0 | 0 | 0 |
| Proteobacteria  | Betaproteobacteria         | unclassified Betaproteobacteria      |                              | 15 | 16 | 0 | 1 | 8 |
| Proteobacteria  | Deltaproteobacteria        | Desulfobacterales                    | Desulfobulbaceae             | 4  | 0  | 0 | 1 | 0 |
| Proteobacteria  | Deltaproteobacteria        | Myxococcales                         | Cystobacterineae             | 3  | 3  | 0 | 0 | 1 |
| Proteobacteria  | Deltaproteobacteria        | Myxococcales                         | Sorangineae                  | 4  | 5  | 0 | 0 | 1 |
| Proteobacteria  | Deltaproteobacteria        | Syntrophobacterales                  | Syntrophaceae                | 1  | 0  | 0 | 1 | 1 |
| Proteobacteria  | Epsilonproteobacteria      | Campylobacterales                    | Campylobacteraceae           | 1  | 0  | 0 | 0 | 0 |
| Proteobacteria  | Gammaproteobacteria        | Enterobacteriales                    | Enterobacteriaceae           | 1  | 0  | 0 | 0 | 0 |
| Proteobacteria  | Gammaproteobacteria        | unclassified Gammaproteobacteria     |                              | 11 | 8  | 1 | 0 | 5 |
| Proteobacteria  | Gammaproteobacteria        | Xanthomonadales                      | Xanthomonadaceae             | 1  | 0  | 0 | 0 | 4 |
| Spirochaetes    | Spirochaetes               | Spirochaetales                       | Leptospiraceae               | 12 | 0  | 2 | 2 | 3 |
| Verrucomicrobia | Spartobacteria             | Spartobacteria genera incertae sedis |                              | 1  | 0  | 0 | 0 | 0 |
| Verrucomicrobia | Subdivision5               | Subdivision5 genera incertae sedis   |                              | 4  | 0  | 0 | 0 | 2 |
| Verrucomicrobia | Verrucomicrobiae           | Verrucomicrobiales                   | Verrucomicrobiaceae          | 2  | 1  | 0 | 1 | 1 |
| Euryarchaeota   | Methanomicrobia            | Methanosarcinales                    | Methanosaetaceae             | 0  | 1  | 0 | 0 | 3 |
| Firmicutes      | Clostridia                 | Clostridiales                        | Incertae Sedis XIII          | 0  | 2  | 0 | 0 | 3 |

|                |                     |                   |                            |   |   |   |   |   |
|----------------|---------------------|-------------------|----------------------------|---|---|---|---|---|
| Firmicutes     | Clostridia          | Clostridiales     | unclassified Clostridiales | 0 | 1 | 0 | 0 | 1 |
| Proteobacteria | Alphaproteobacteria | Rhizobiales       | Methylocystaceae           | 0 | 4 | 2 | 0 | 0 |
| Proteobacteria | Deltaproteobacteria | Bdellovibrionales | Bdellovibrionaceae         | 0 | 1 | 0 | 0 | 0 |
